# Supplementary material for: Heterozygous Ldlr-Deficient Hamster as a Model to Evaluate the Efficacy of PCSK9 Antibody in Hyperlipidemia and Atherosclerosis
Source: Int J Mol Sci. 2019 Nov 26;20(23):5936. doi: 10.3390/ijms20235936 (PMC6929182; doi:10.3390/ijms20235936)
Supplement: Supplementary file 1 [file ijms-20-05936-s001.pdf]

## Supplementary Materials

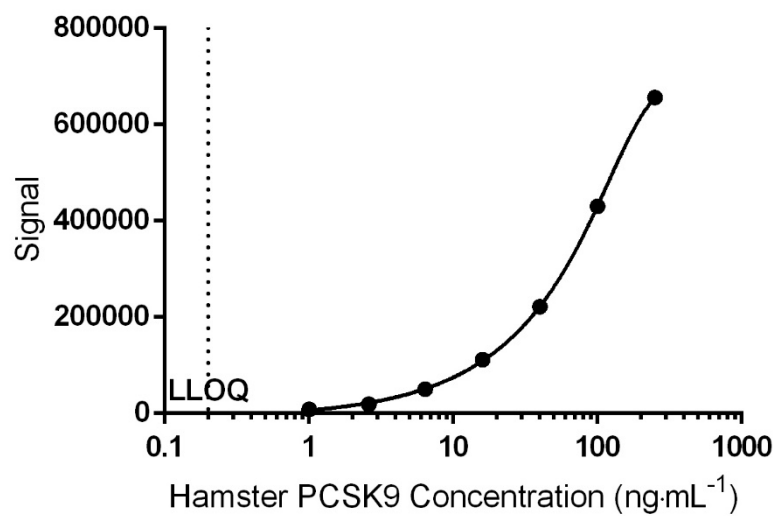

**Supplementary Figure S1.** Hamster free PCSK9 luminescent oxygen channeling immunoassay (LOCI) assay standard curve. Standard curve was fitted using five-parameter logistic equation. Lower limit of quantification (LLOQ) concentration of this assay was 0.2 ng·mL<sup>-1</sup>.

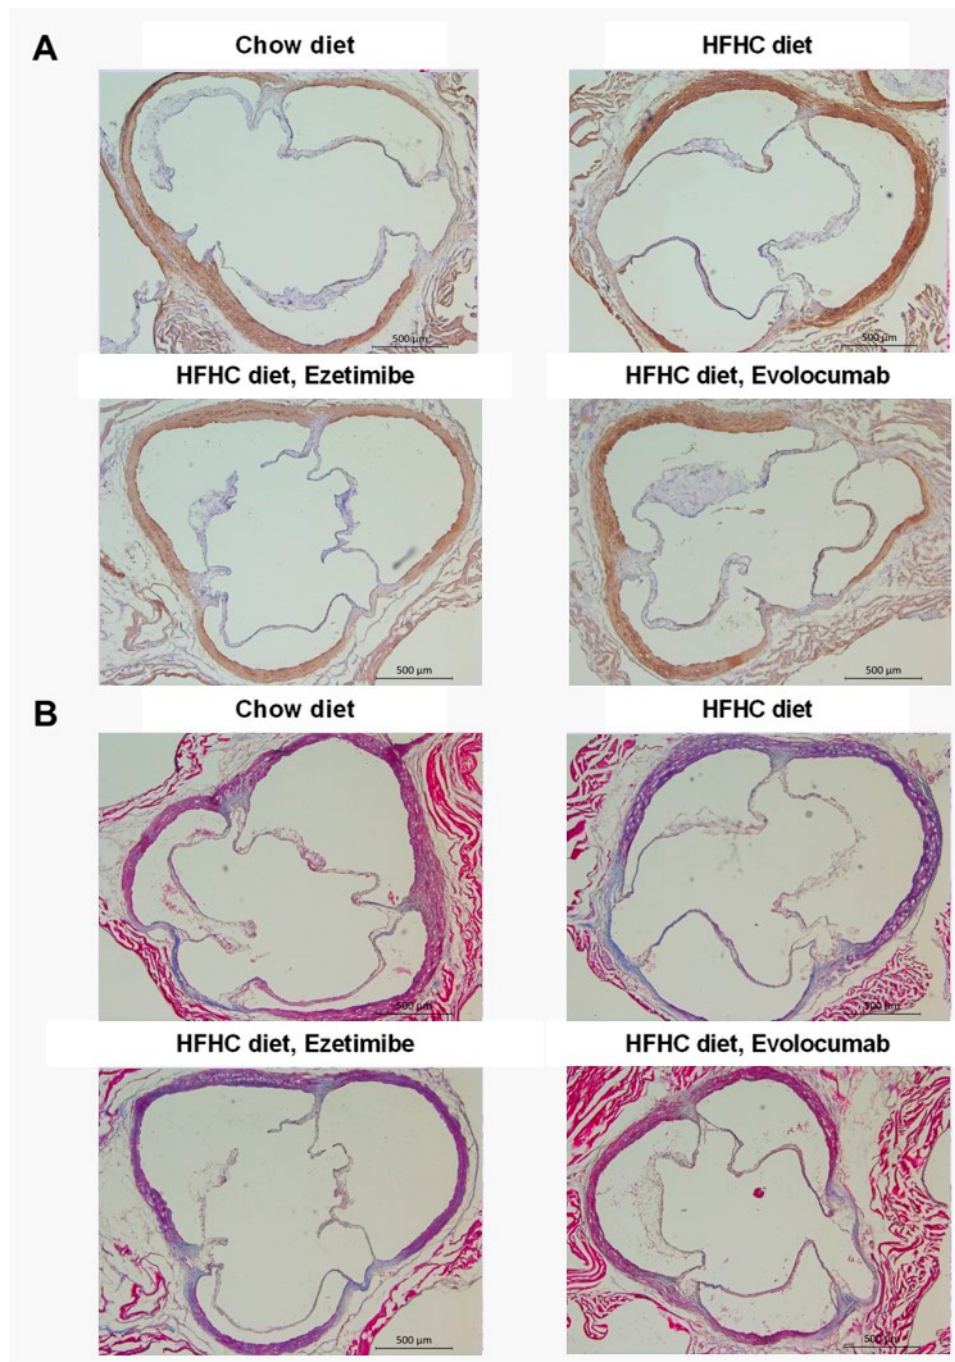

**Supplementary Figure S2.** Representative images of (A) smooth muscle actin- $\alpha$  (SMA- $\alpha$ ) staining and (B) Masson's trichrome staining in aortic valve.
